# Supplementary material for: Analyzing Relationships Between Economic and Neighborhood-Related Social Determinants of Health and Intensive Care Unit Length of Stay for Critically Ill Children With Medical Complexity Presenting With Severe Sepsis
Source: Frontiers journal article supplement (doi:10.3389/fpubh.2022.789999), 2022-04-29
Supplement: Table_1.pdf [file Table_1.pdf]

**Table S1. Social Determinants of Health among CMC with Severe Sepsis in Shelby County, Tennessee**

| <b>Social Determinants of Health</b>                                                                    | <b>Evaluated Encounters (n)</b> | <b>Median (IQR)</b> |
|---------------------------------------------------------------------------------------------------------|---------------------------------|---------------------|
| <b>Overall Social Vulnerability Index (SVI)<sup>a</sup></b>                                             | 83                              |                     |
| High                                                                                                    | 41                              | 10.4 (3.32-22.13)   |
| Moderate to High                                                                                        | 18                              | 7.77(3.24-17.68)    |
| Low to Moderate                                                                                         | 6                               | 4.63 (4.18-7.14)    |
| Low                                                                                                     | 18                              | 8.52 (5.39-19.2)    |
| Estimated median income of a family (USD) <sup>b</sup>                                                  | 83                              | 45504 (35752-78009) |
| % population below poverty rate <sup>b</sup>                                                            | 83                              | 26.5 (10.2-37.9)    |
| <b>Neighborhood Quality</b>                                                                             |                                 |                     |
| Risk of exposure to lead (1-10) <sup>c</sup>                                                            | 83                              |                     |
| 1                                                                                                       | 12                              | 11.96 (5.08-25.46)  |
| 2                                                                                                       | 5                               | 4.3 (0.96-4.95)     |
| 3                                                                                                       | 2                               | 9.3 (0.92-17.68)    |
| 5                                                                                                       | 5                               | 11.45 (7.14-12.51)  |
| 6                                                                                                       | 11                              | 10.81 (4.45-23.16)  |
| 7                                                                                                       | 14                              | 6.59 (2.61-9.95)    |
| 8                                                                                                       | 15                              | 16.35 (3.24-38.4)   |
| 9                                                                                                       | 2                               | 5.63 (3.42-7.83)    |
| 10                                                                                                      | 17                              | 10.4 (5.97-20.35)   |
| Environmental health hazard index (1-100) <sup>d</sup>                                                  | 83                              | 38 (29-49)          |
| <b>Access to Transportation<sup>e</sup></b>                                                             |                                 |                     |
| Estimated % of housing units without vehicles                                                           | 83                              | 6.81 (2.96-12.78)   |
| <b>Access to Healthcare<sup>e</sup></b>                                                                 |                                 |                     |
| Distance to nearest Hospital (miles)                                                                    | 80                              | 2.63 (1.87-3.63)    |
| <b>Access to Food Sources<sup>f</sup></b>                                                               |                                 |                     |
| Estimated % of housing units without a vehicle and beyond 0.5 miles from a supermarket or grocery store | 83                              | 0.06 (0.016-0.114)  |
| Distance to nearest Farmers Market (miles)                                                              | 80                              | 3.03 (1.82-4.28)    |
| <b>Parent Household Composition<sup>b</sup></b>                                                         |                                 |                     |

|                                                                              |    |                     |
|------------------------------------------------------------------------------|----|---------------------|
| Estimated % of all families that are headed by a single female with children | 83 | 20.11 (11.38-35.32) |
|------------------------------------------------------------------------------|----|---------------------|

---

**Minorities/Language**

|                                                                         |    |                |
|-------------------------------------------------------------------------|----|----------------|
| Estimated % of all people age 5 and older who were non-English speakers | 83 | 2.27 (0.7-5.4) |
|-------------------------------------------------------------------------|----|----------------|

---

<sup>a</sup>Source: CDC (33, 36)

<sup>b</sup>Source: US Census ACS (2015-2019) (39)

<sup>c</sup>1: low lead exposure, 10: high lead exposure; Source: Dept. Housing and Urban Development (HUD) (35,38)

<sup>d</sup>1 – high health hazard, 100 – low health hazard; Source: U.S. Dept. Housing and Urban Development (HUD) (as of 2015) (34,37)

<sup>e</sup>Source: CAESER (41)

<sup>f</sup>Source: USDA (2017) (40)
